# Supplementary material
Source: PubMed Central journal article supplement (PMC2657583)

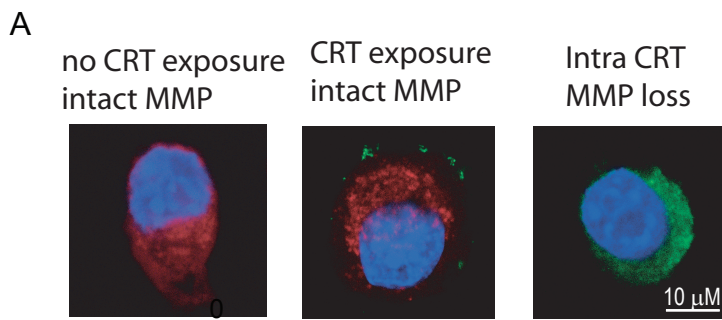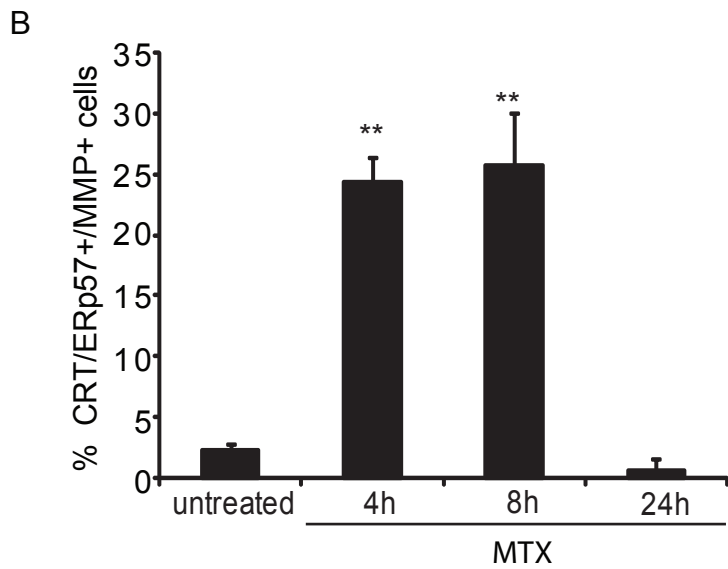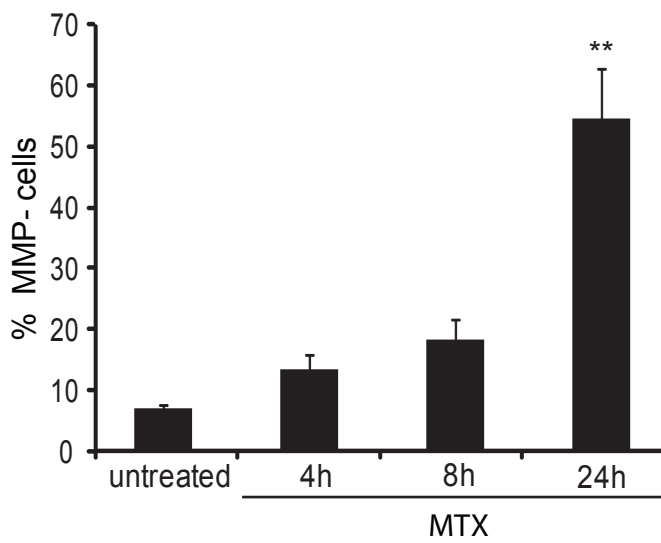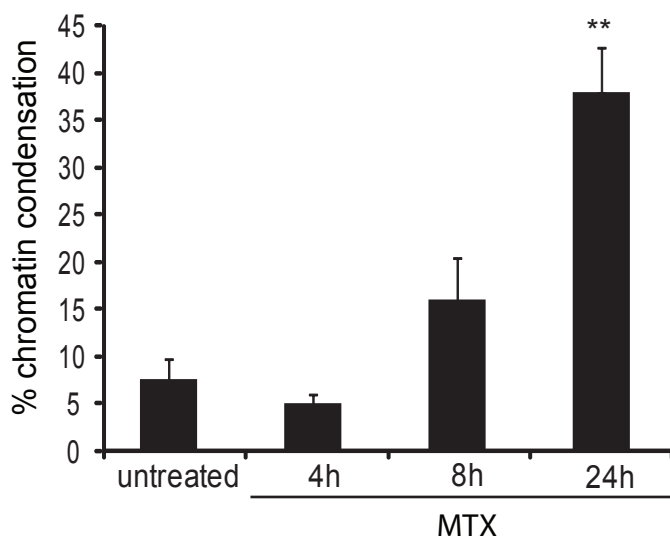

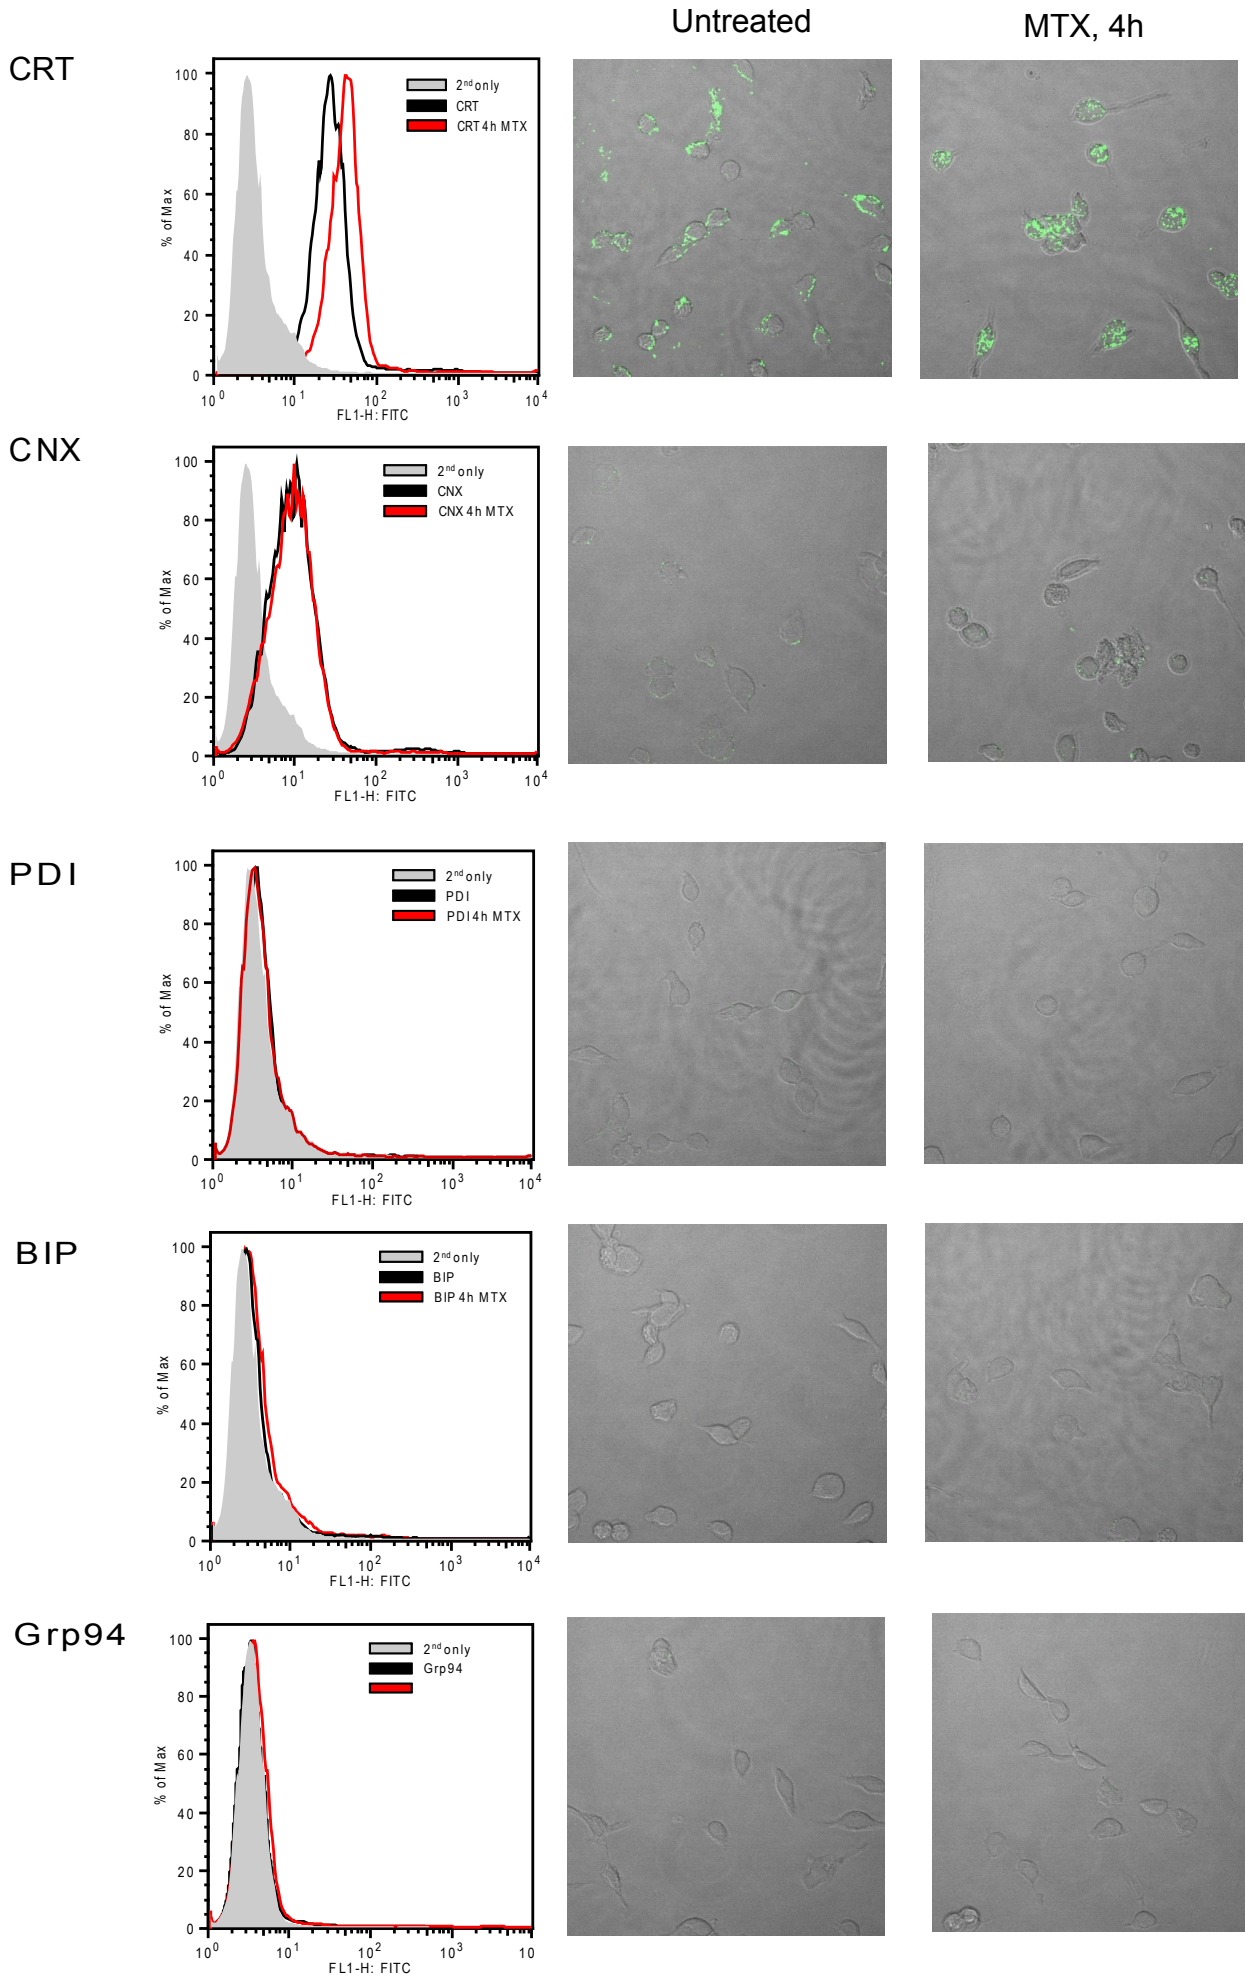

Supplementary figure 2

A

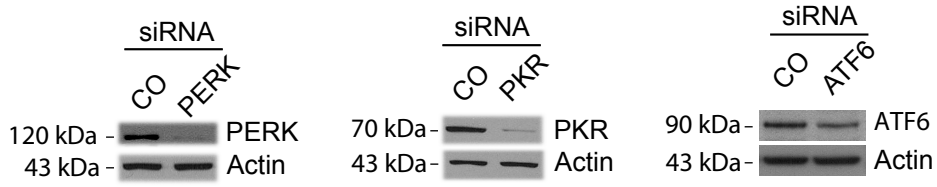

B

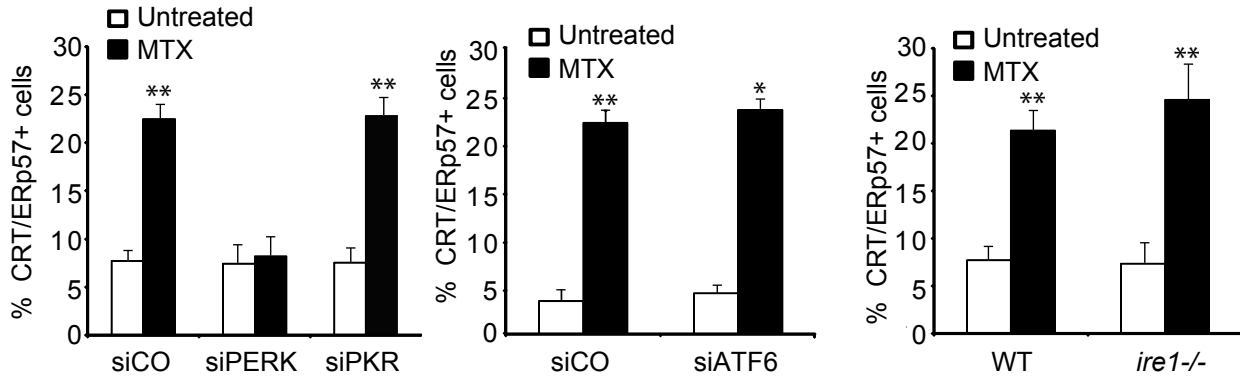

A

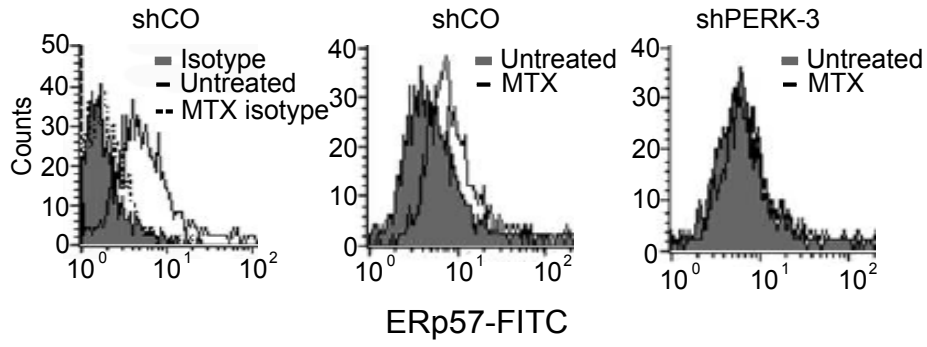

B

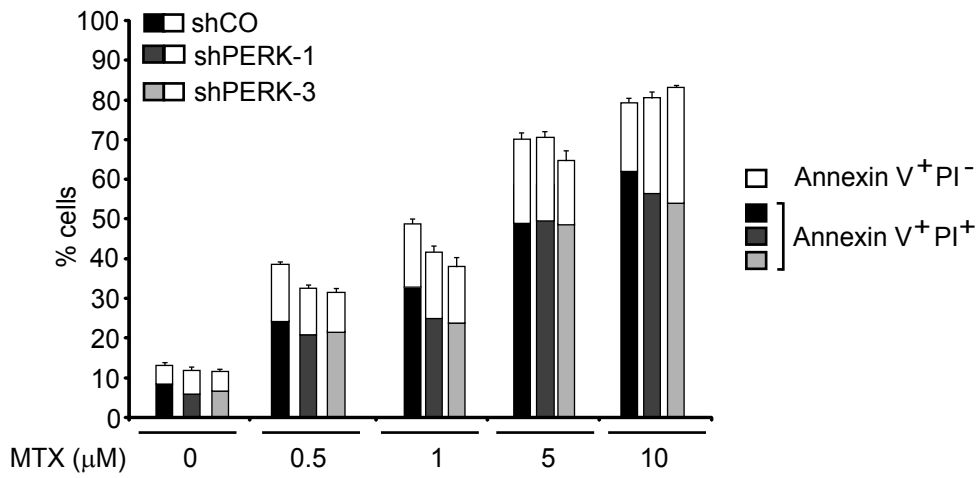

C

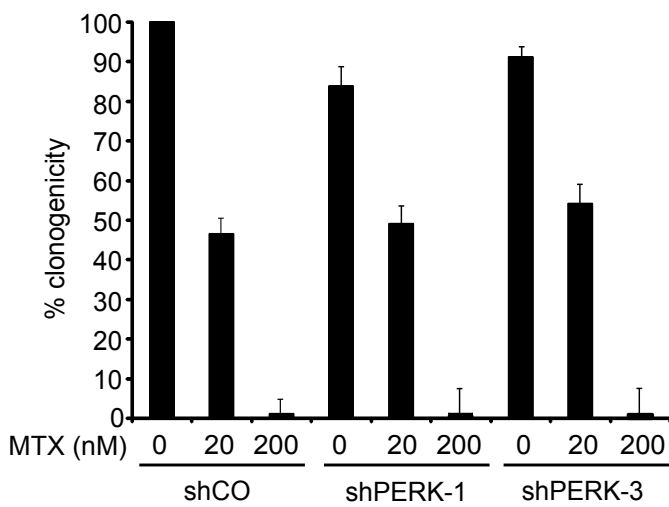

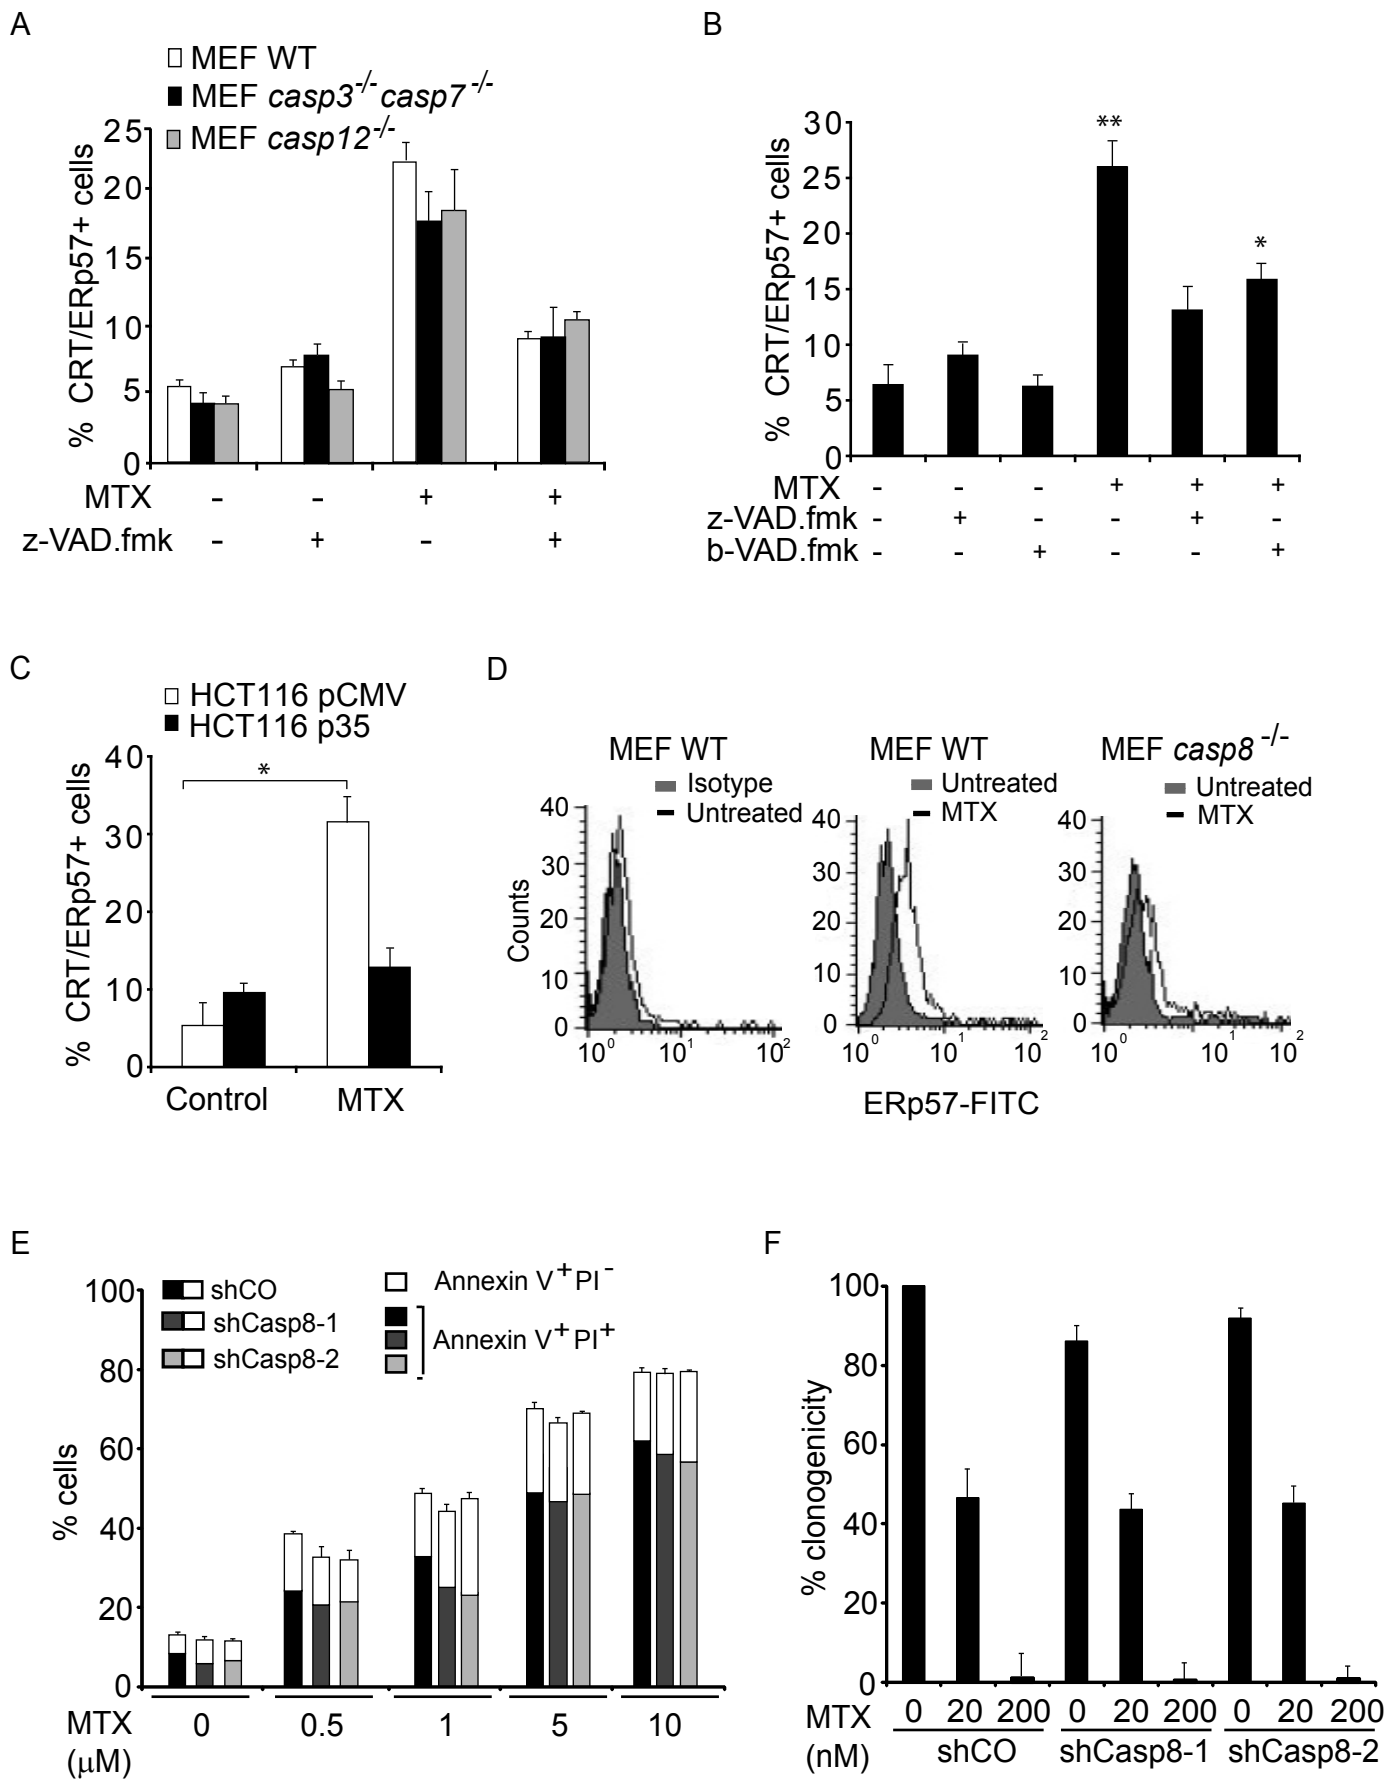

Supplementary figure 5

A

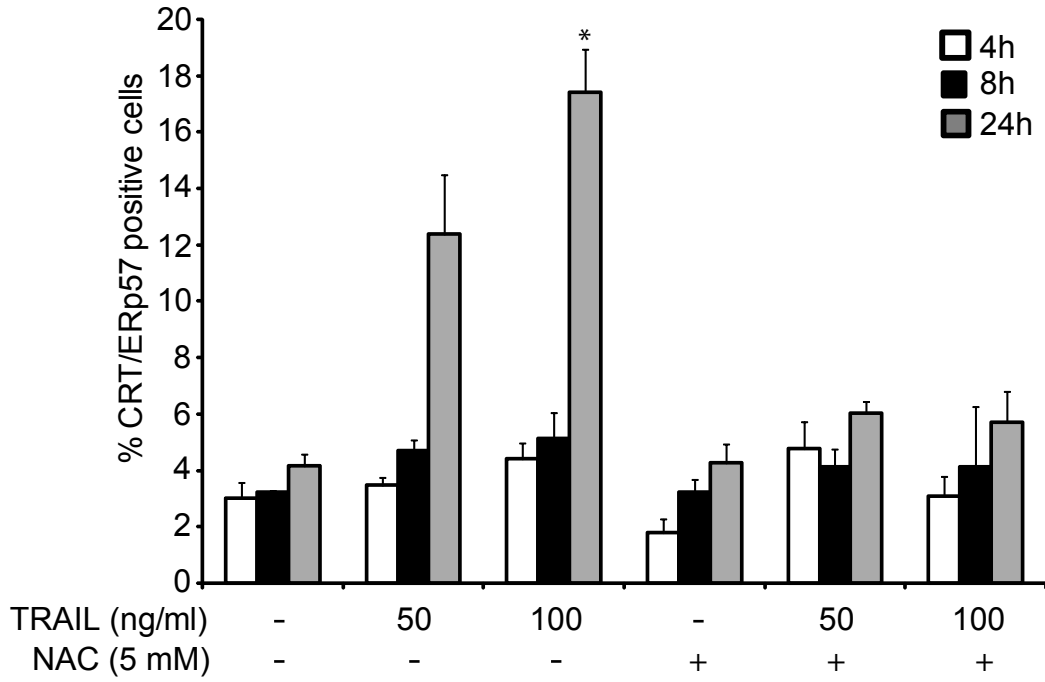

B

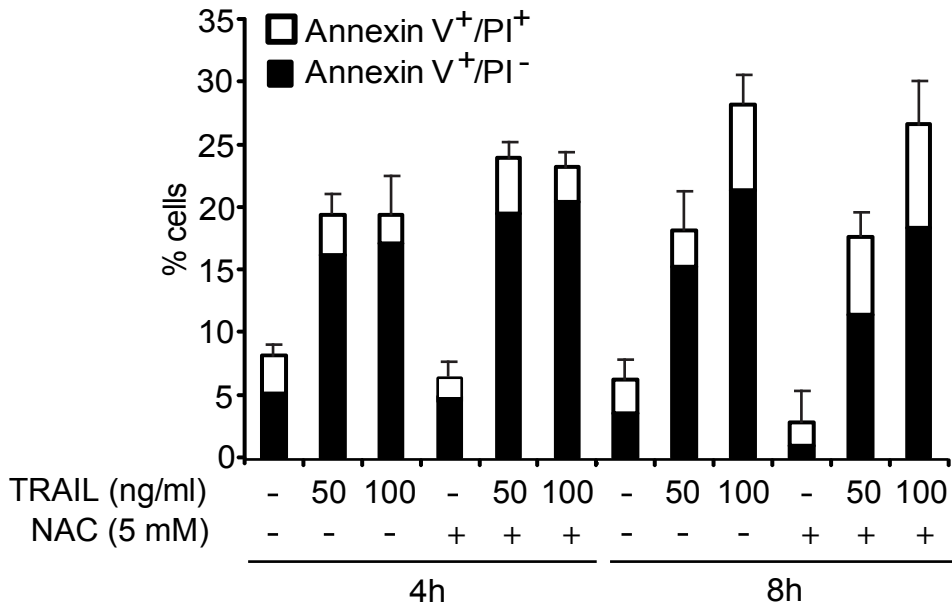

C

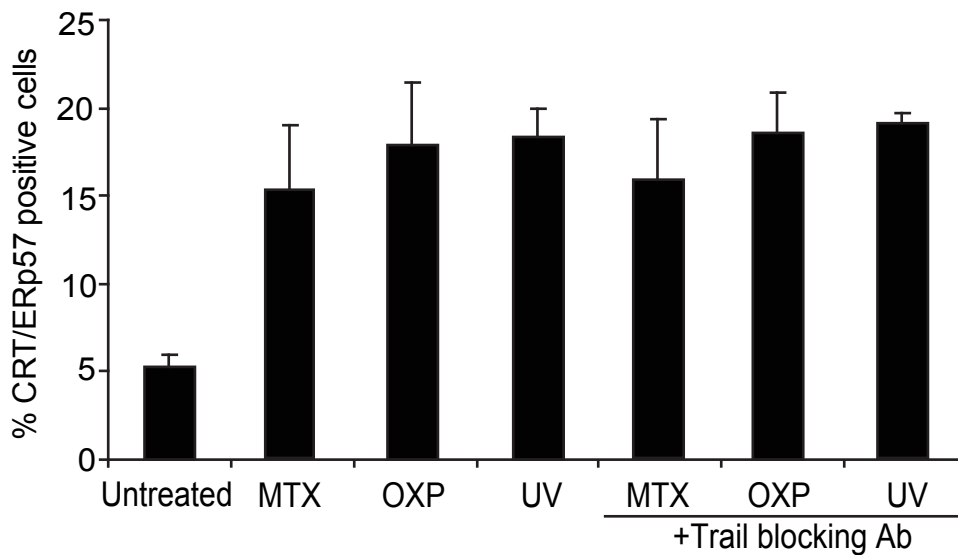

A

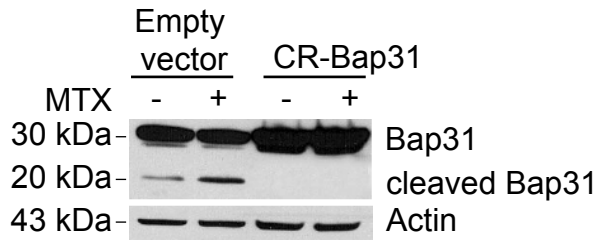

B

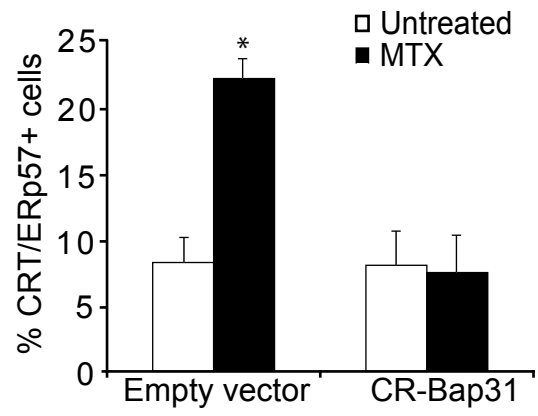

C

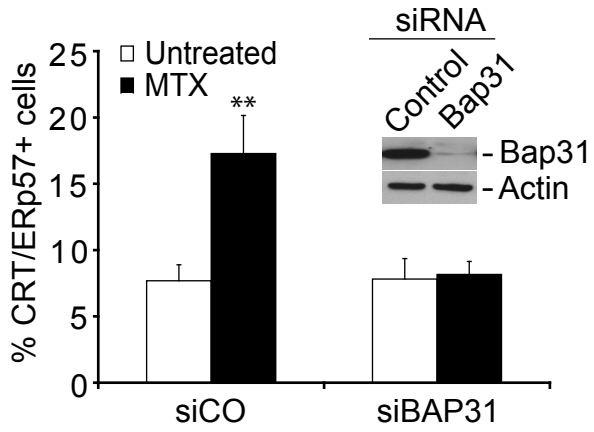

D

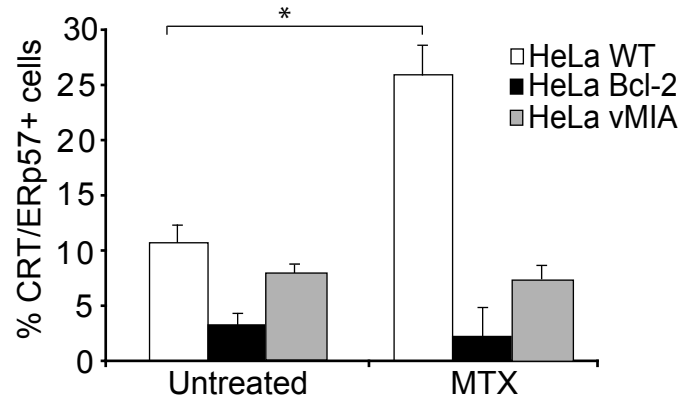

E

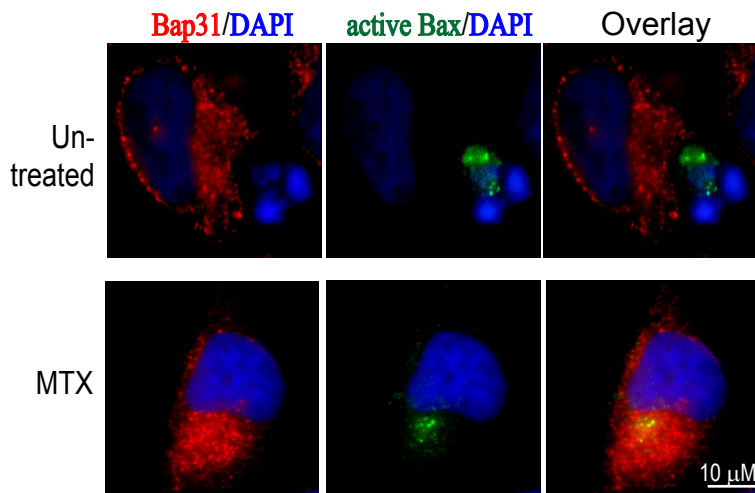

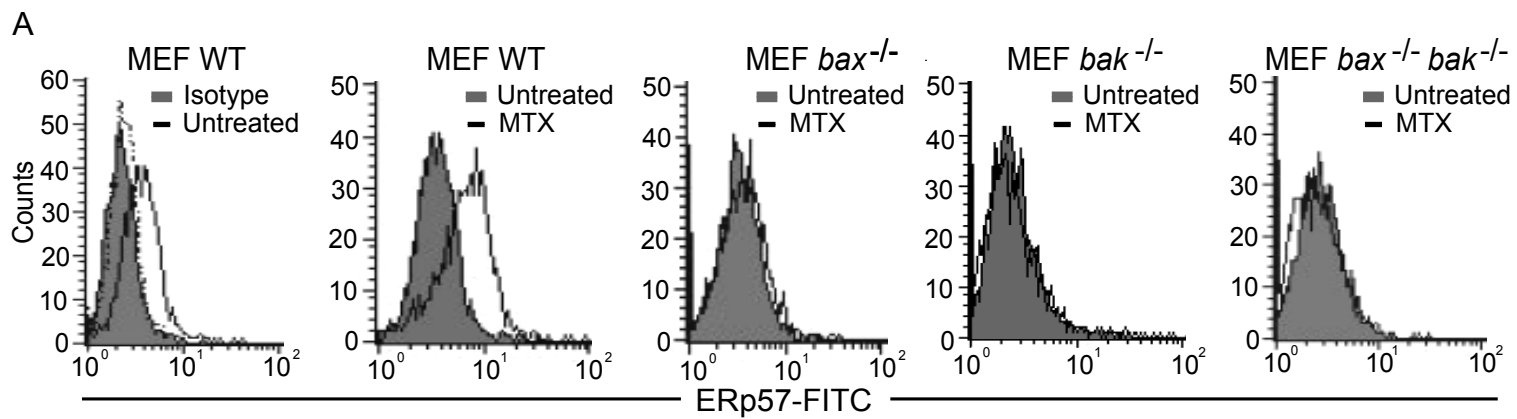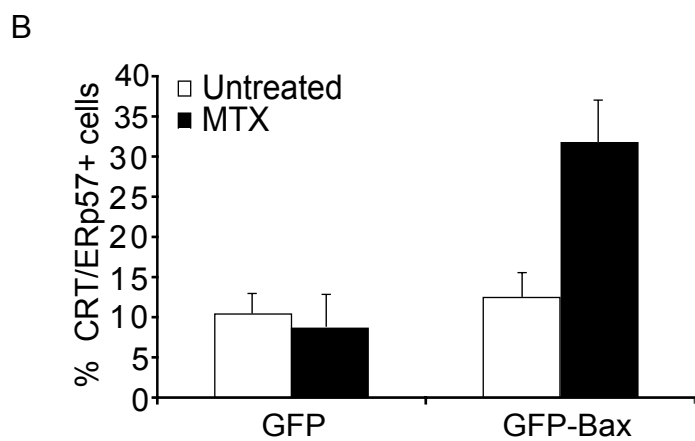



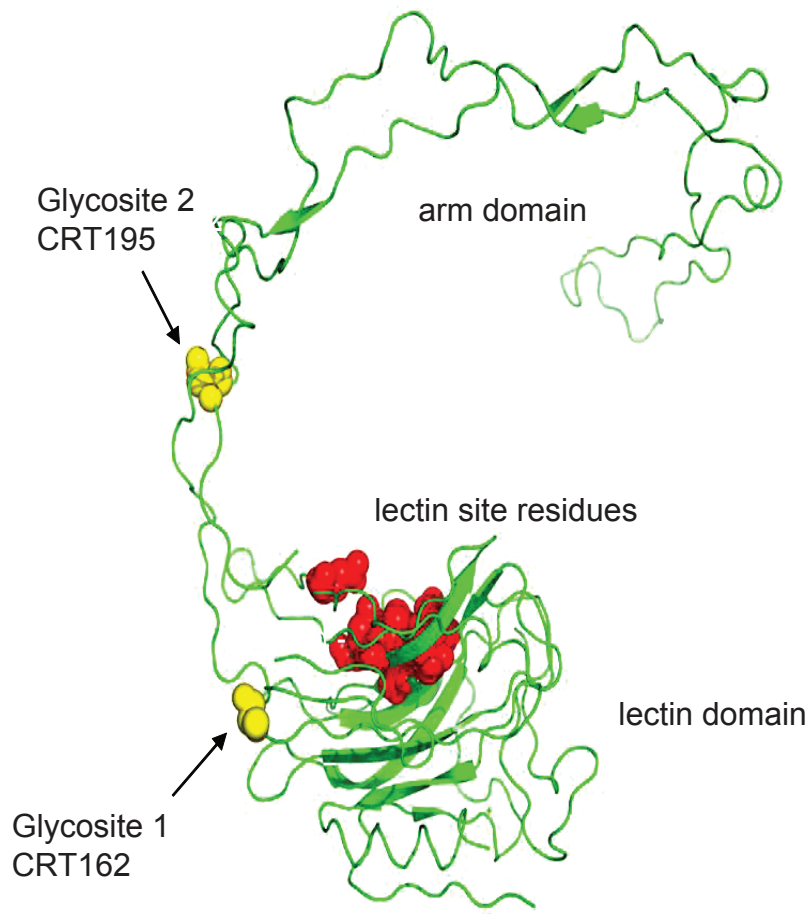

Supplement: emboj20091s1.pdf [file emboj20091s1.pdf]

A

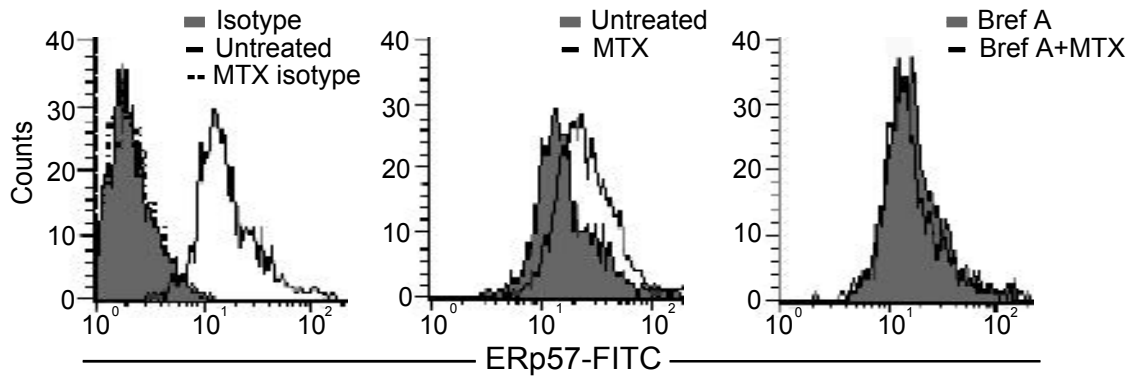

B

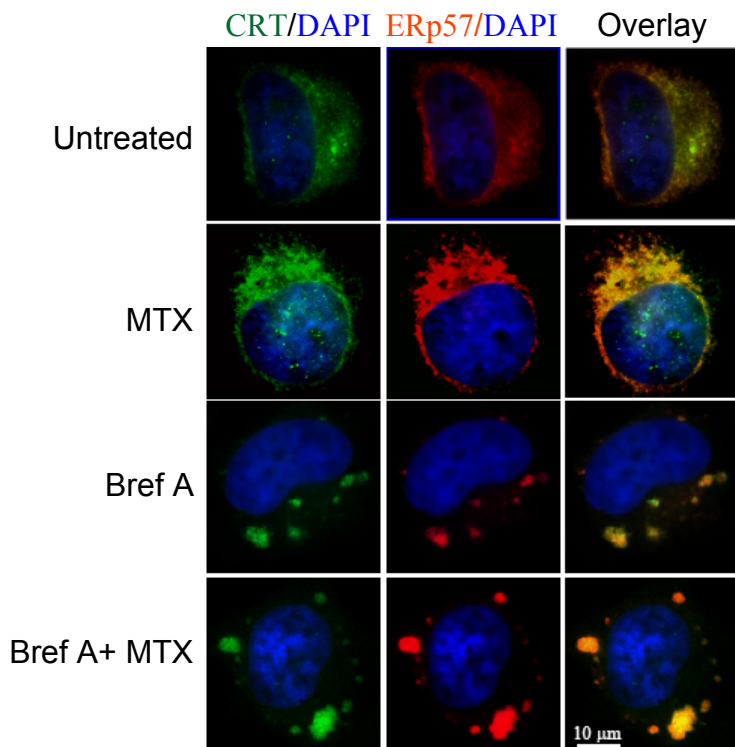

A

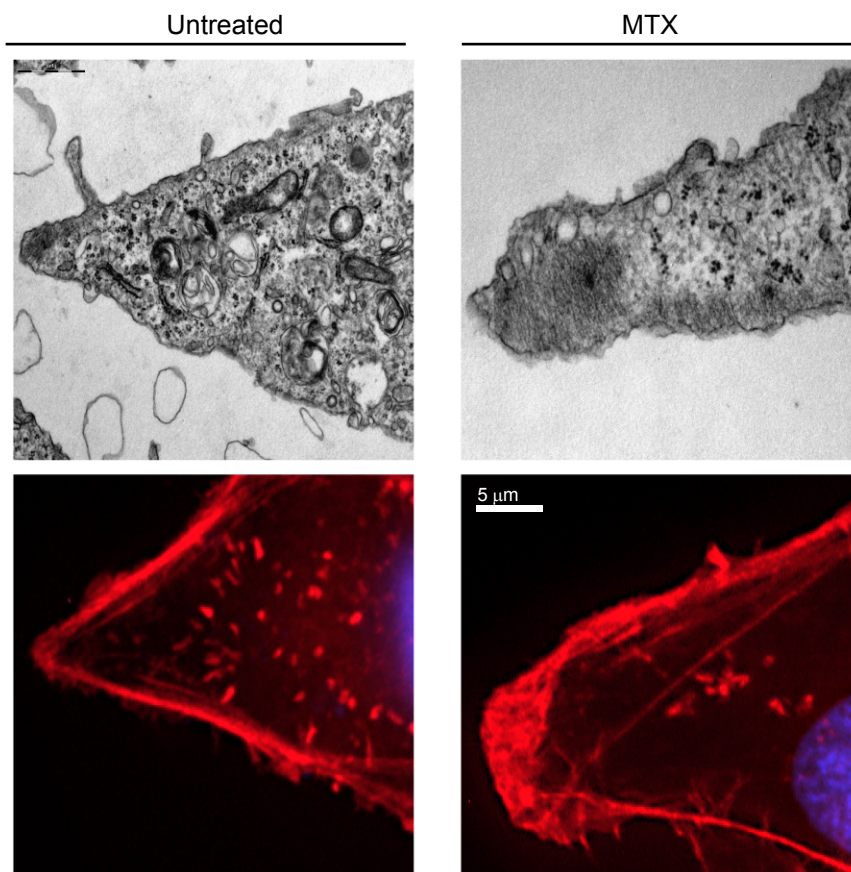

B

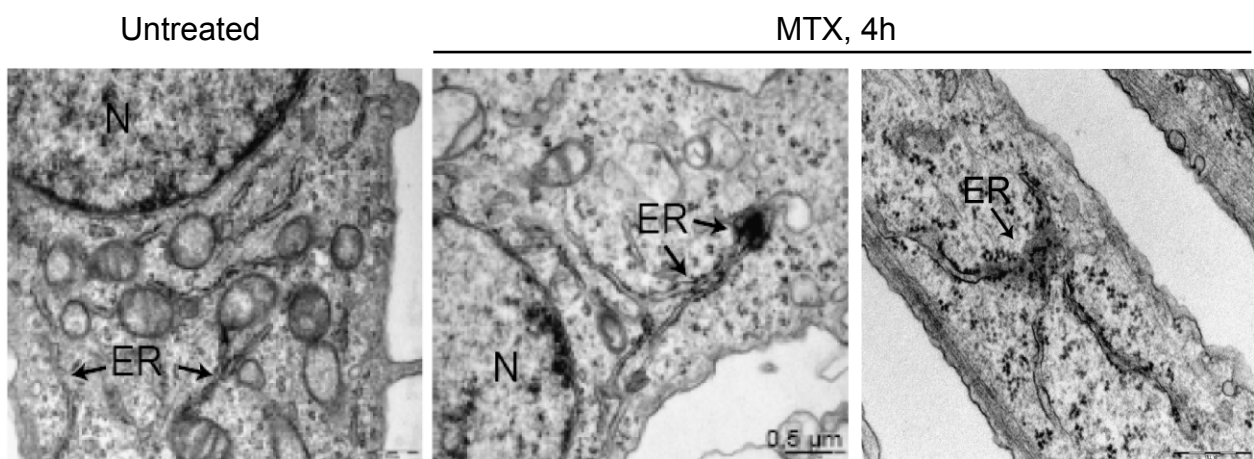

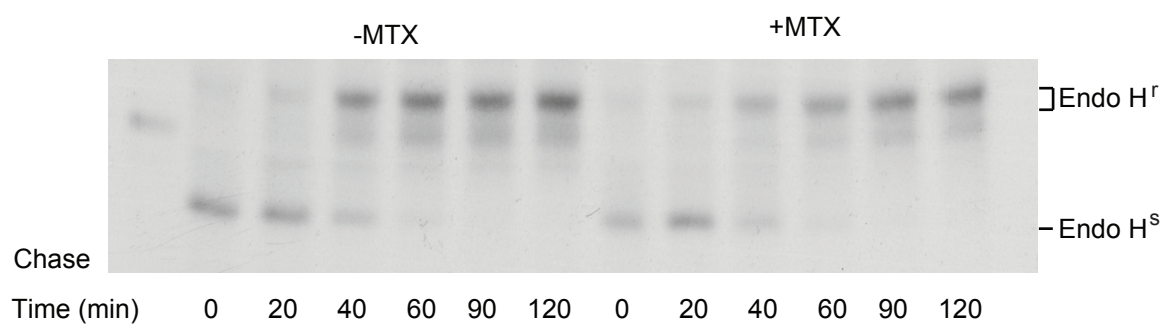

A

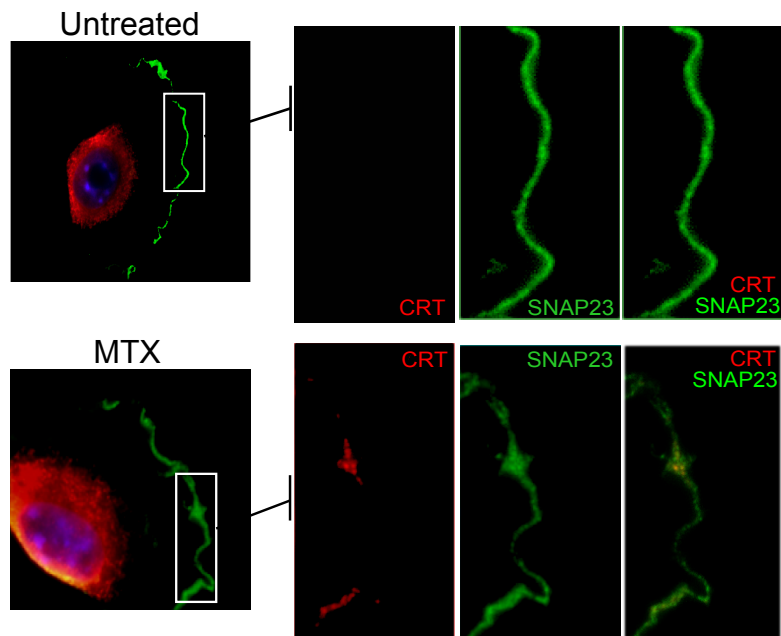

B

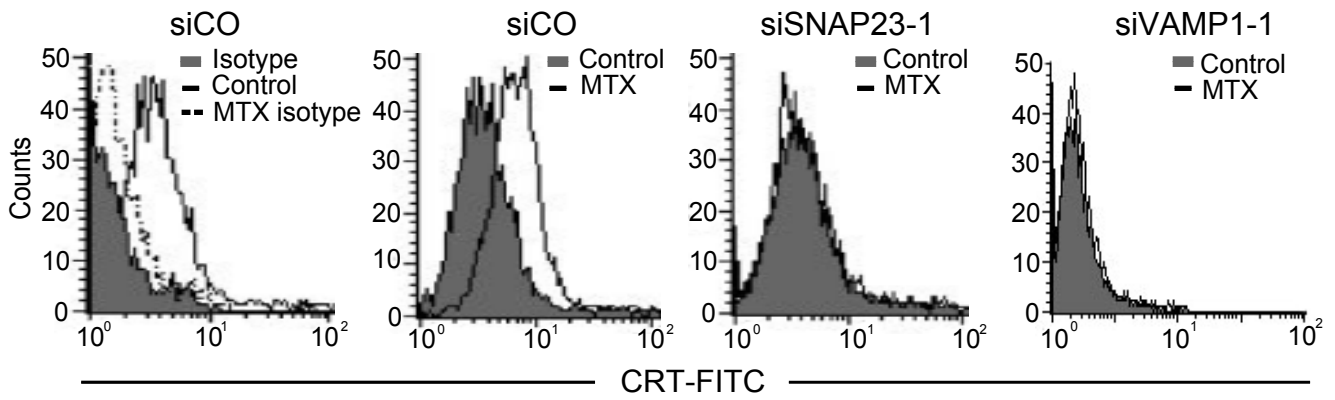

A

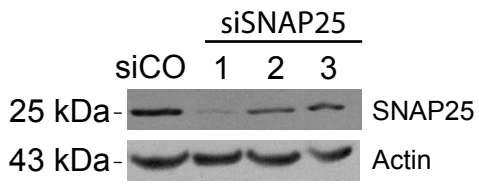

B

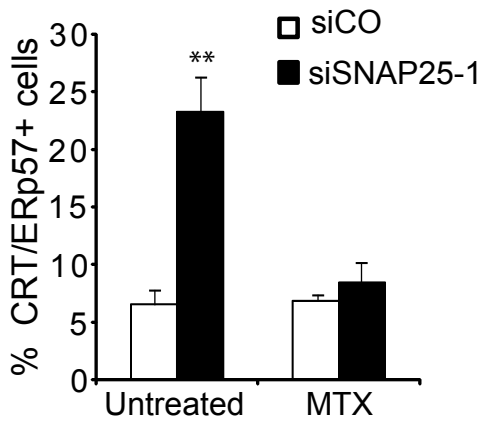

A

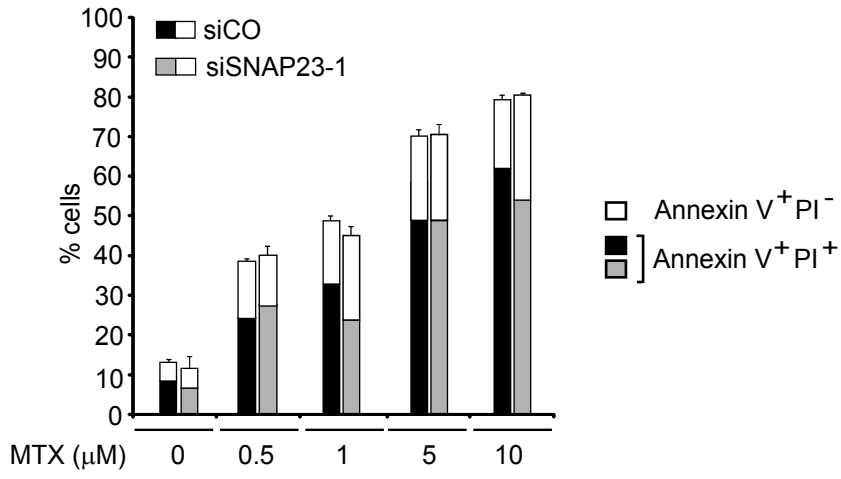

B

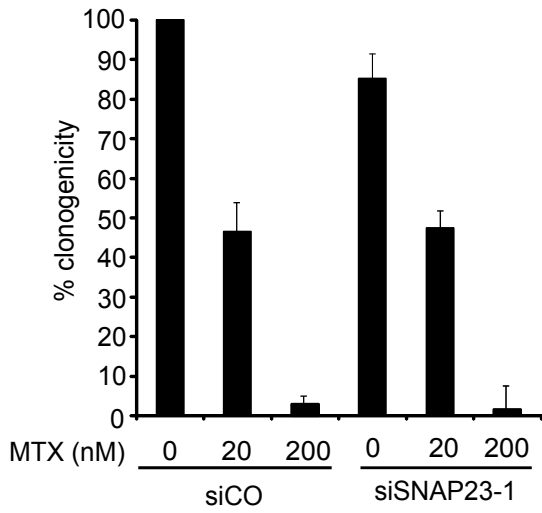

Supplement: emboj20091s2.pdf [file emboj20091s2.pdf]
